# Supplementary material for: ABRO1 suppresses tumourigenesis and regulates the DNA damage response by stabilizing p53
Source: PubMed Central journal article supplement (PMC4205886; doi:10.1038/ncomms6059), 2014-10-06
Supplement: ncomms6059-s1.pdf [file ncomms6059-s1.pdf]

---

**Supplementary Information**

**ABRO1 suppresses tumorigenesis and regulates the DNA damage response by stabilizing p53**

Jianhong Zhang, *et al.*

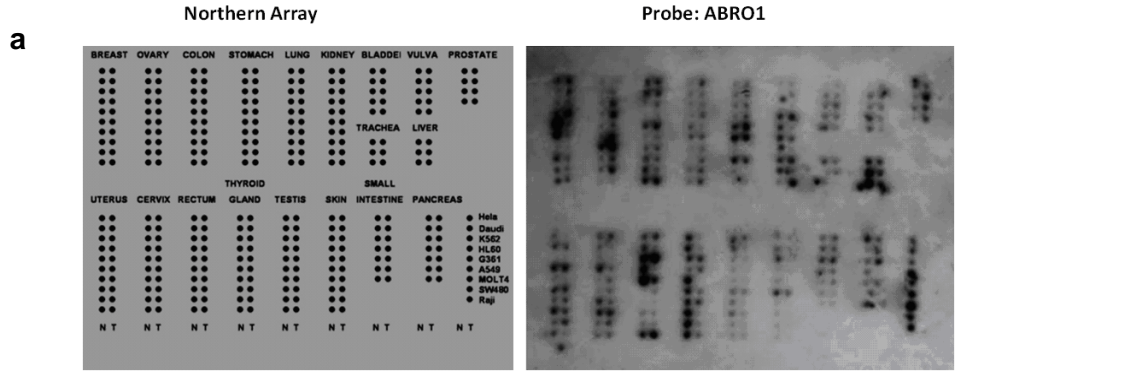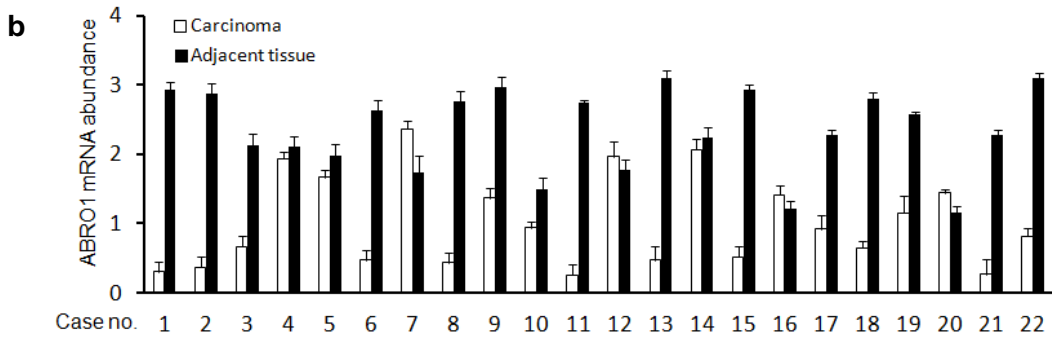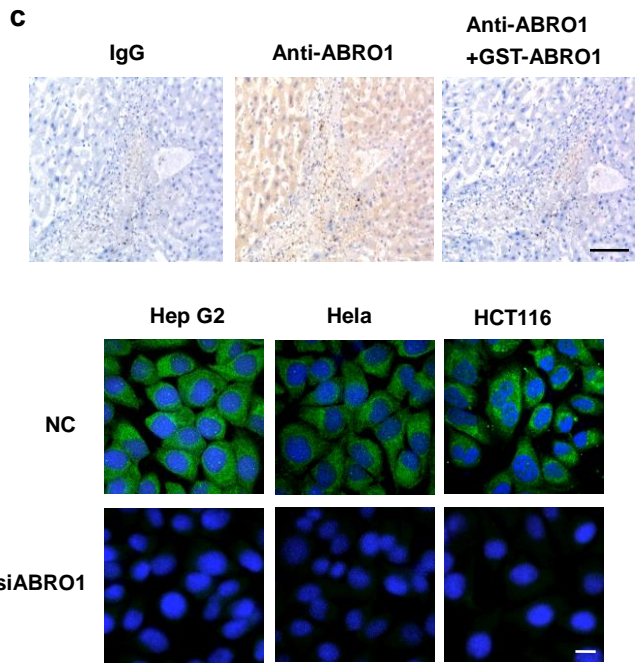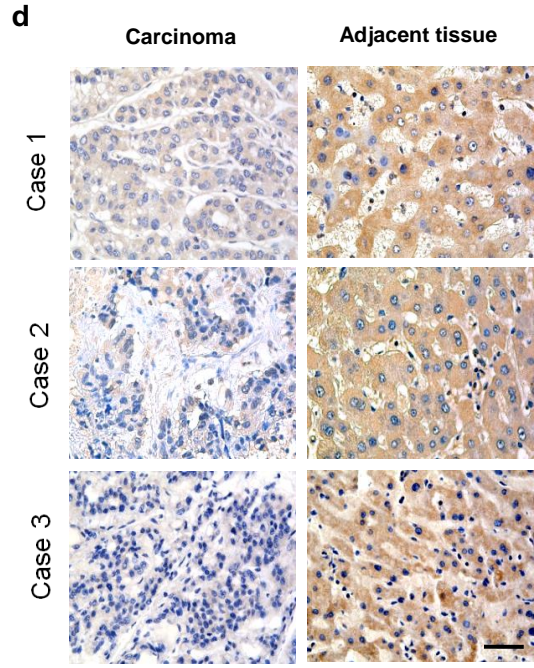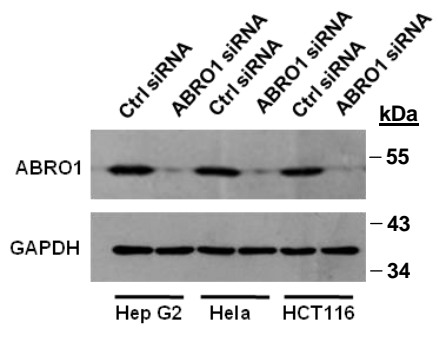

---

**Supplementary Figure 1. The differential expression pattern of ABRO1 in human multiple tumour tissues and corresponding normal tissues.** (a) The radioactivated *ABRO1*-specific probe was hybridized onto an array containing 154 cDNA pairs of samples derived from multiple human tumours and corresponding normal tissue from individual patients (Cancer Profiling Array II, Clontech). N = normal tissue sample. T = tumour tissue sample. (b) *ABRO1* mRNA extracted from 22 HCC patients was detected with *ABRO1* and *GAPDH* primers. Data are shown as means  $\pm$  s.d. of three independent experiments. (c) The validation of the specificity of the antibody to *ABRO1*. Upper panels, Immunohistochemical staining for hepatic cancer specimens incubated with IgG or *ABRO1*-specific antibody. To validate the specificity, monoclonal antibody to *ABRO1* was pre-incubated with recombinant GST-*ABRO1* protein for 1 h prior to applying to tissue. Scale bar represents 50 $\mu$ m. Middle panels, immunofluorescence staining for *ABRO1* in HepG2, HeLa and HCT116 cells transfected with control or *ABRO1* siRNA. Scale bar represents 10 $\mu$ m. Bottom panels, Western blot analysis of the lysates from the cells as in middle. (d) Immunohistochemical staining for hepatic cancer specimens incubated *ABRO1*-specific antibody. Representative pictures were selected to show the alterations in the expression of *ABRO1*. Scale bar represents 35 $\mu$ m.

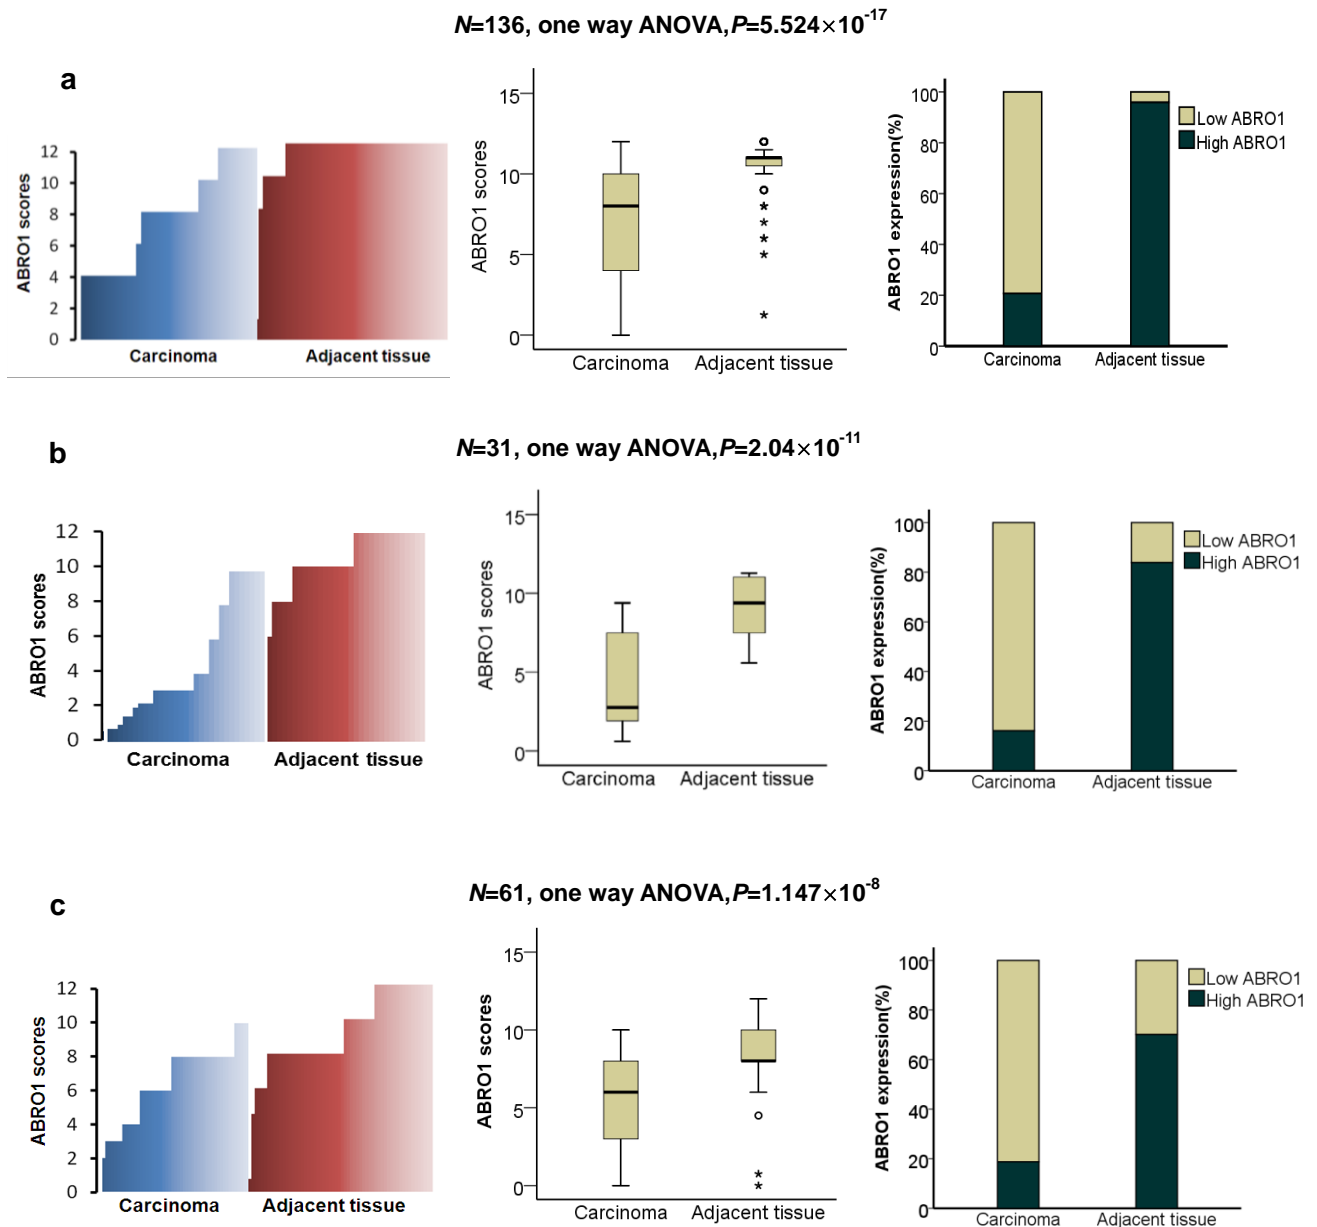

**Supplementary Figure 2. The downregulation of ABRO1 in different kinds of tumours.** Immunohistochemical analyses were performed to determine the expression of ABRO1 in renal cell cancer tissues (a), thyroid gland cancer tumour tissues (b), breast cancer tissues (c) and normal adjacent tissue samples.  $P < 0.01$ , one-way ANOVA.

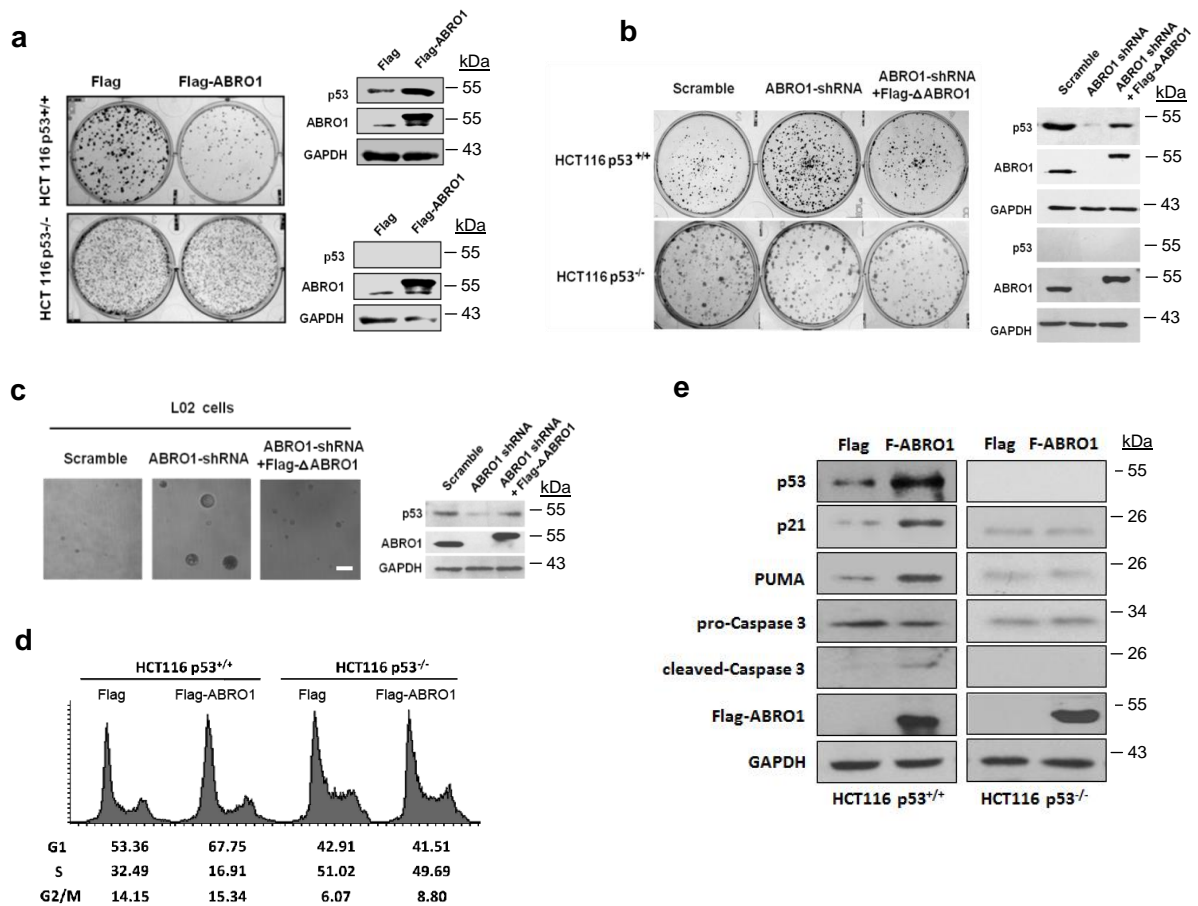

**Supplementary Figure 3. ABRO1 suppress tumourigenesis in a p53-dependent**

**manner.** (a) HCT116 p53<sup>+/+</sup> and HCT116 p53<sup>-/-</sup> cells were transfected with pCMV-Flag-ABRO1 or pCMV-Flag vectors, and the number of G418-resistant clones was determined (Left). Lysates of G418-resistant cells were subjected to western blot with anti-p53, anti-ABRO1 and anti-GAPDH antibodies (Right). (b) HCT116 p53<sup>+/+</sup> and HCT116p53<sup>-/-</sup> cells were infected with control pBPLV lentivirus or pBPLV lentivirus encoding shRNA specific to ABRO1 or pBPLV lentivirus encoding ABRO1 shRNA and RNAi-immune ABRO1. GFP-positive cells were selected by FACS and clones were counted 2 weeks after initial plating (Left). Lysates were subjected to western blot with anti-p53, anti-ABRO1 and anti-GAPDH antibodies (Right). (c) L02

---

cells were infected with control pBPLV lentivirus or pBPLV lentivirus encoding shRNA specific to ABRO1 or pBPLV lentivirus encoding ABRO1 shRNA and RNAi-immune ABRO1, and plated into soft agar. GFP-positive cells were selected by FACS and clones were counted 2 weeks after initial plating (Left). Scale bar represents 200 $\mu$ m. Lysates were subjected to western blot with anti-p53, anti-ABRO1 and anti-GAPDH antibodies (Right). **(d)** HCT116 p53<sup>+/+</sup> and HCT116 p53<sup>-/-</sup> cells were transfected with pCMV-Flag-ABRO1 or pCMV-Flag control vectors, and the G418-resistant cells were selected. Cells were pulsed for 1 h with BrdU before being harvested, fixed, stained with anti-BrdU FITC and propidium iodide (PI), sorted by flow cytometry and analyzed for DNA content. **(e)** Proteins extracted from tumours of nude mice were subjected to western blot with anti-p53, anti-p21, anti-PUMA, anti-Caspase 3, anti-Flag and anti-GAPDH antibodies.

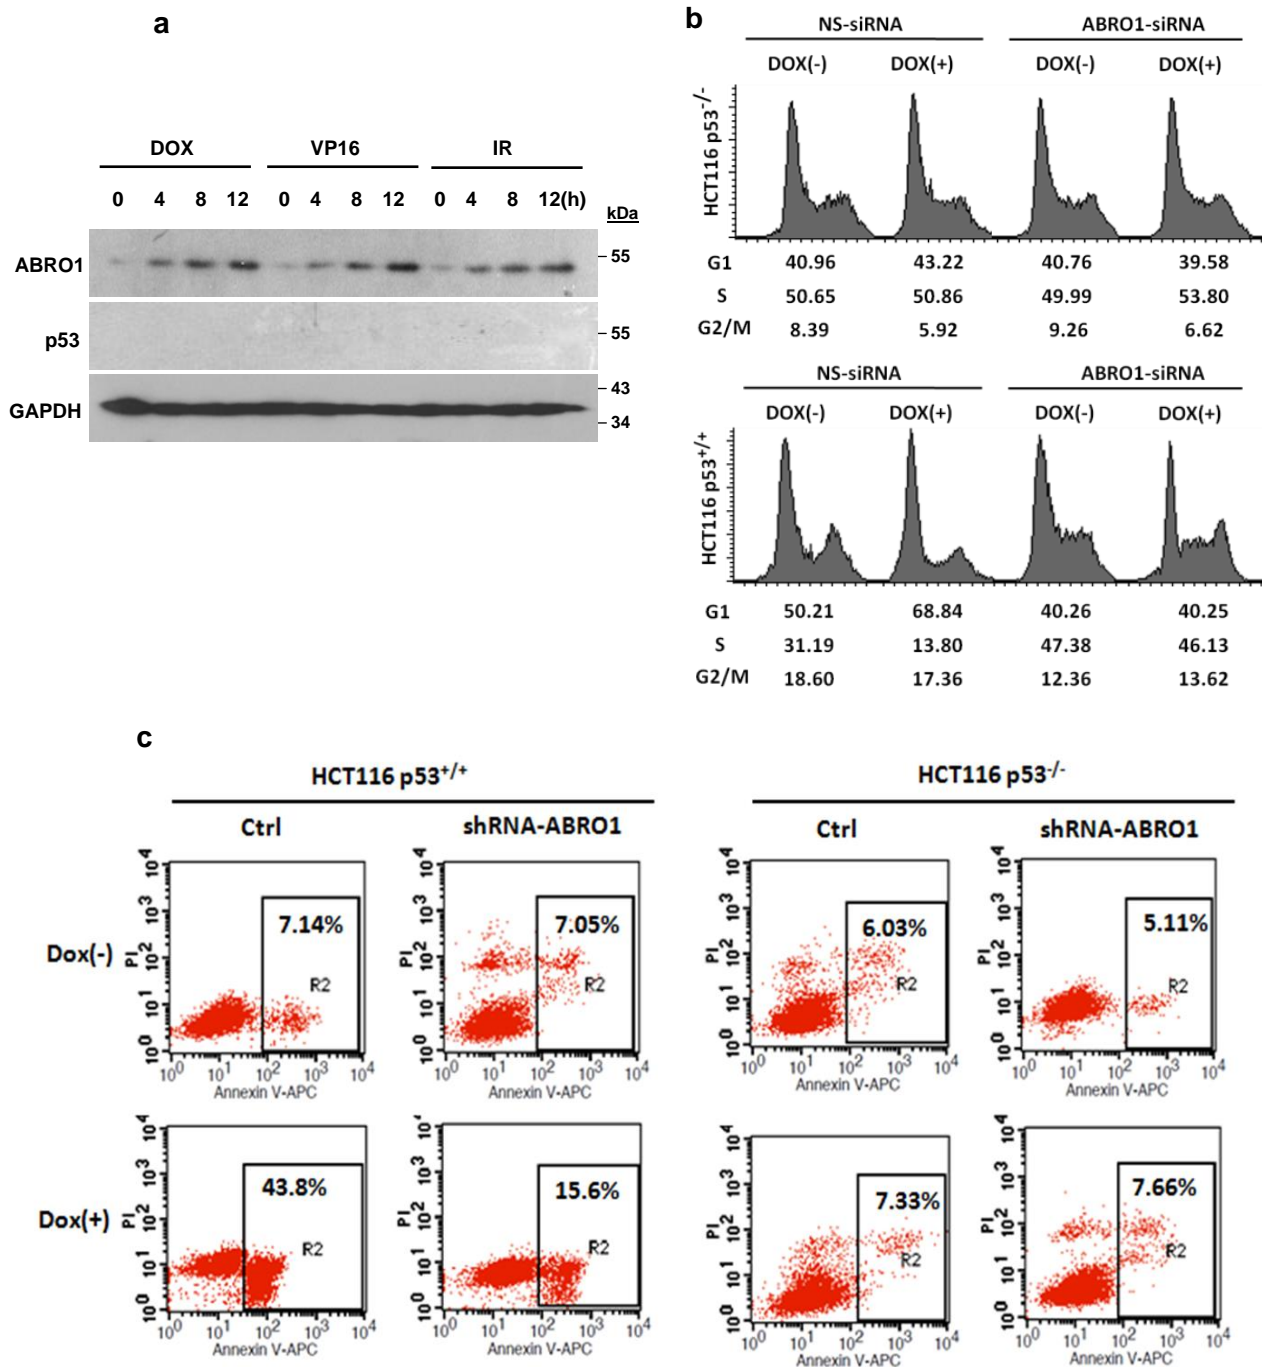

**Supplementary Figure 4. ABRO1 increase apoptosis via p53 in response to DNA damage.** (a) HCT116 p53<sup>-/-</sup> cells were treated with DOX, VP16 and IR as indicated times, protein were extracted and subjected to western blot. (b) HCT116 cells were transfected with siABRO1-1 or siNC. 48 h after transfection, cells were treated with 2

---

$\mu\text{g/ml}$  DOX for 8 h before harvested and cell-cycle profiles were determined by FACS as described in Supplementary Figure 3d. (c) HCT116 cells were infected with control pBPLV lentivirus or pBPLV lentivirus encoding shRNA specific to ABRO1, and treated with 2  $\mu\text{g/ml}$  DOX for 8 h. Cell apoptosis was examined by FACS.



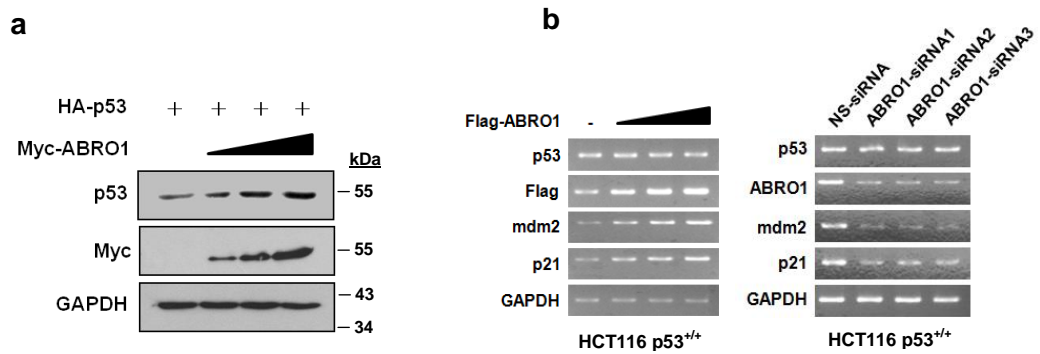

**Supplementary Figure 5. ABRO1 effects p21, MDM2 but not p53 mRNA level. (a)**

HCT116 p53<sup>-/-</sup> cells were cotransfected with HA-p53 and Myc-ABRO1 expression constructs, after 48 hours, the lysates were analyzed by immunoblotting. **(b)** HCT116 p53<sup>+/+</sup> cells were transfected with ABRO1 expression vector (left) or ABRO1 siRNA (right) as indicated, after 48 hours, total RNAs were extracted and analyzed by RT-PCR.

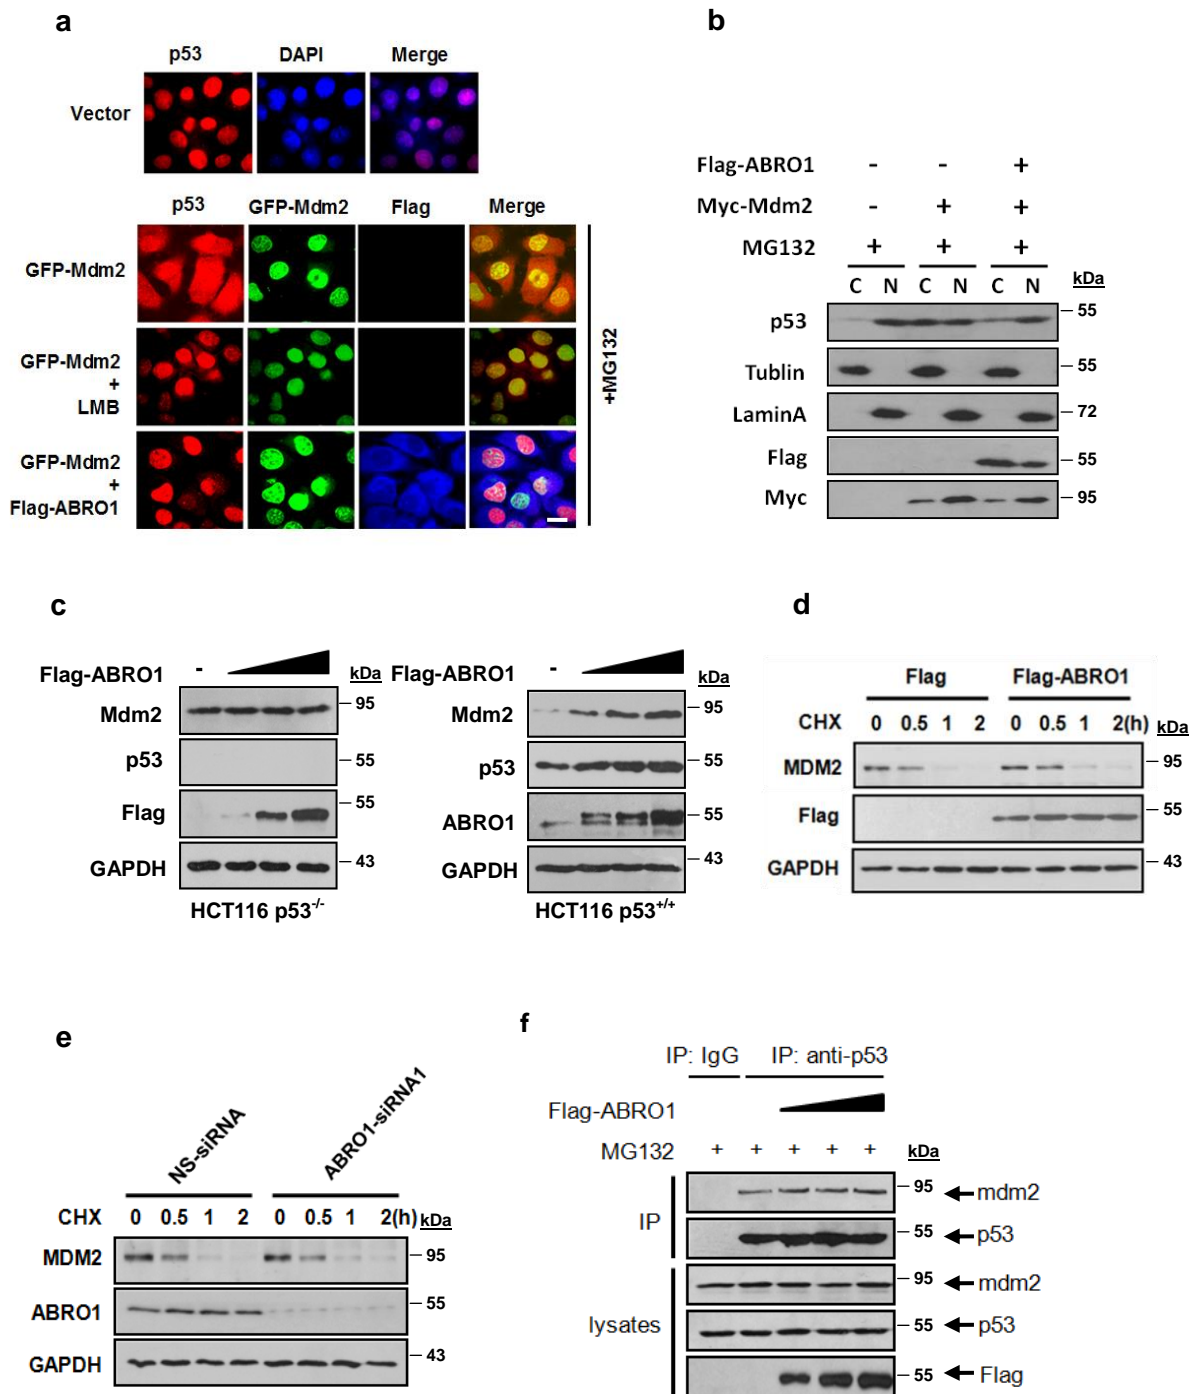

**Supplementary Figure 6. ABRO1 counteracts Mdm2 induced p53 cytoplasmtranslocation.** (a) HCT 116 p53<sup>+/+</sup> cells were seeded onto small slide glass coverslips placed in 24 culture plates, and transfected with the indicated

---

constructs. After 36 h, cells were treated with 20  $\mu$ M MG132 for 6 h before fixed with 4% PFA, immunocytochemistry assay was performed with p53 and ABRO1 antibodies. Leptomycin B was used as a positive control. Scale bar represents 10  $\mu$ m. **(b)** HCT 116 p53<sup>+/+</sup> cells were treated as described in **a**, cell fractionation assay separating cytoplasmic from nuclear proteins was performed and the proteins were immunoblotted with the indicated antibodies. **(c)** HCT116 p53<sup>-/-</sup> cells or HCT116 p53<sup>+/+</sup> cells were transfected with Flag-ABRO1 expression construct, after 24 hours, the lysates were analyzed by immunoblotting as indicated. **(d, e)** HCT116 p53<sup>-/-</sup> cells treated with CHX (1 $\mu$ g/ $\mu$ l) at the indicated time after transfection with Flag-ABRO1 construct or ABRO1 siRNA. Proteins were extracted and subjected to western blot. **(f)** HCT116 p53<sup>+/+</sup> cells transfected with increasing concentrations of plasmid encoding Flag-ABRO1 were treated with MG132 for 4 hours before harvest. Lysates were immunoprecipitated with control IgG or anti-p53 (FL-393) antibody and analyzed by immunoblotting with indicated antibodies.

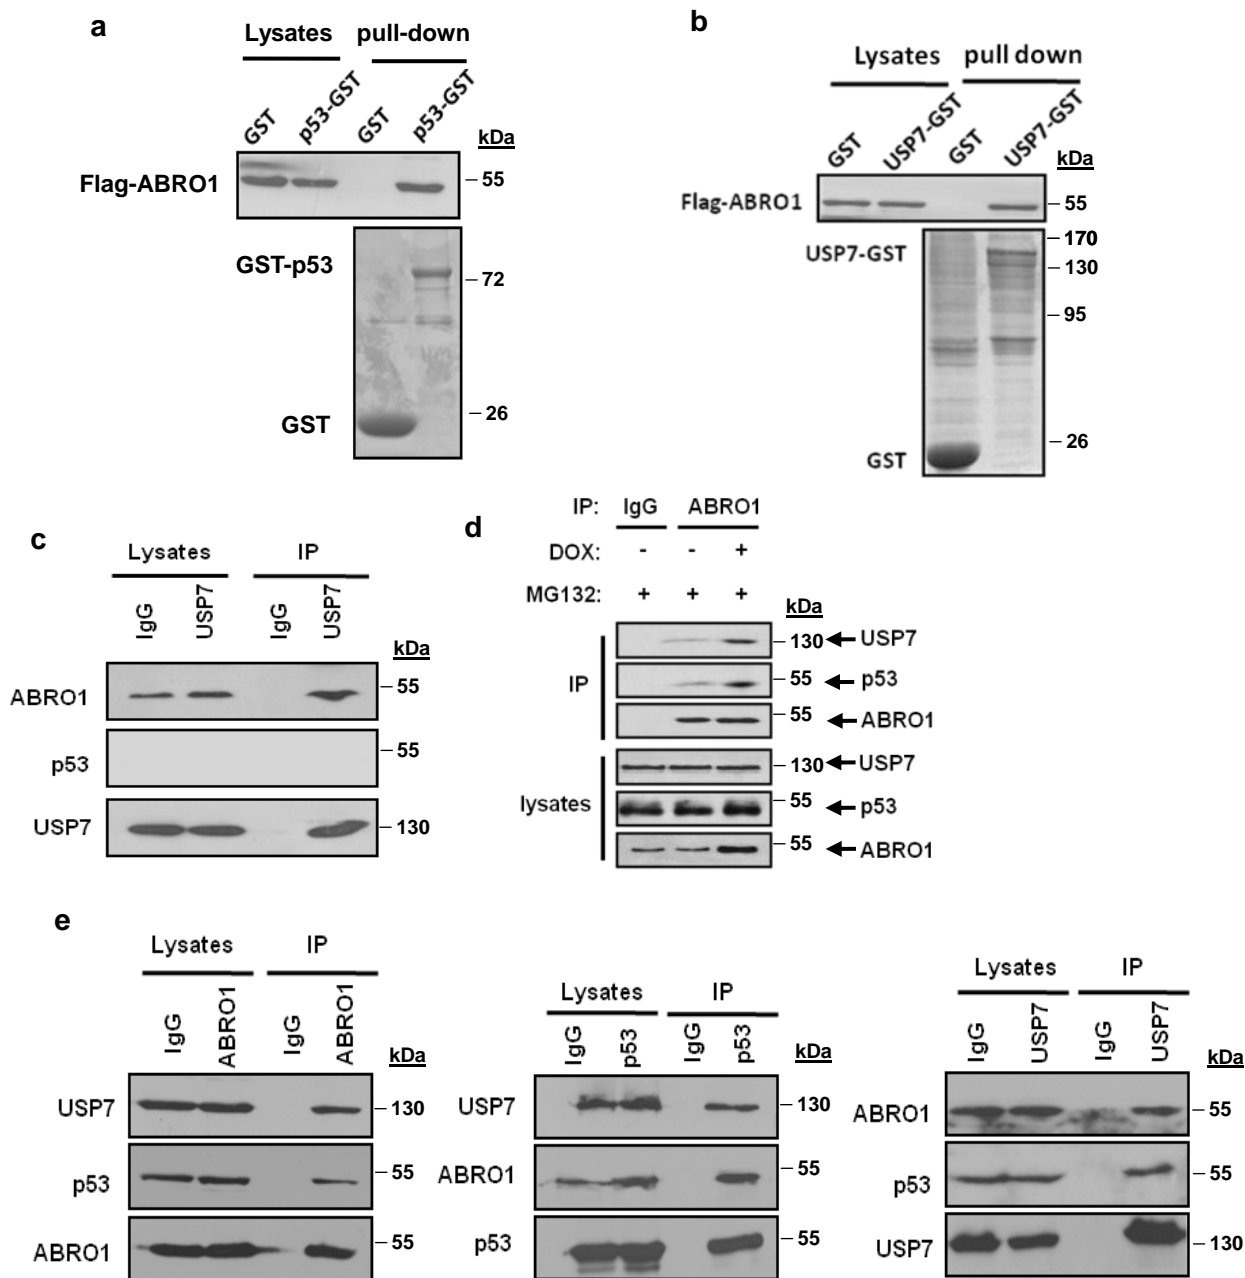

**Supplementary Figure 7. ABRO1 directly binds p53 or USP7 and forms a Complex.** (a) Purified ABRO1 was incubated with GST or GST-p53 coupled to GST-Sepharose. Proteins retained on sepharose were then blotted with the indicated antibodies. (b) Purified ABRO1 was incubated with GST or GST-USP7 coupled to GST-Sepharose. Proteins retained on sepharose were then blotted with the indicated

---

antibodies. **(c)** Lysates of HCT116 p53<sup>-/-</sup> cells were subject to immunoprecipitation with control IgG and anti-USP7 antibody. The immunoprecipitates were then blotted with the indicated antibodies. **(d)** The interaction between extent of immunoprecipitation of p53 and USP7 by ABRO1 was greater after DOX treatment than control condition. HCT116 p53<sup>+/+</sup> cells were treated with DOX for 12h, and then treated with MG132 for 6h before harvested. Lysates were extracted for immunoprecipitation assay with IgG or anti-ABRO1 antibody. The immunoprecipitates were then blotted with the indicated antibodies. **(e)** HCT116 p53<sup>+/+</sup> cell lysates were subjected to immunoprecipitation with control IgG, anti-p53, anti-USP7 or anti-ABRO1 antibodies. The immunoprecipitates were then blotted with the indicated antibodies.

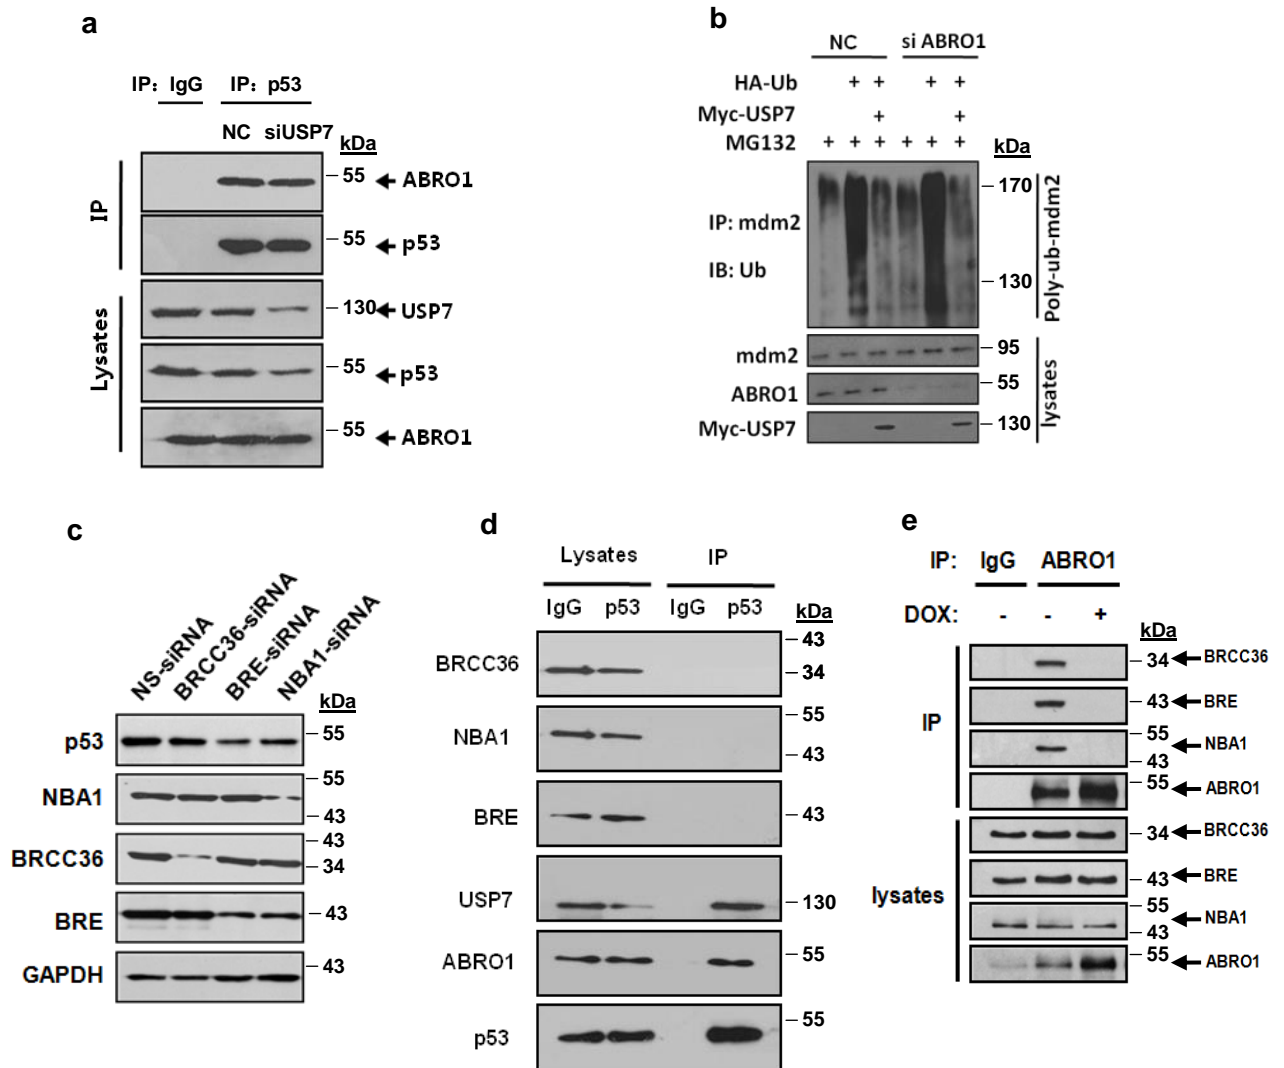

**Supplementary Figure 8. ABRO1 regulates p53 stability independent on the**

**BRISC complex. (a)** HCT 116 p53<sup>+/+</sup> cells was transfected with USP7 siRNA or

control siRNA, after 48hours, the lysates were immunoprecipitated using

p53-specific antibody and analyzed by immunoblotting as indicated. **(b)** HCT116

p53<sup>-/-</sup> cells co-transfected with the indicated constructs and NC-siRNA or ABRO1

siRNA were treated with MG132 for 4 hours before harvest. Lysates were

immunoprecipitated with anti-mdm2 antibody and analyzed by immunoblotting

---

with anti-Ub antibody. **(c)** HCT116 p53<sup>+/+</sup> cells were transfected with siRNAs as indicated, after 48 hours, the lysates were analyzed by immunoblotting as indicated. **(d)** HCT116 p53<sup>+/+</sup> cell lysates were immunoprecipitated using IgG or p53-specific antibody and analyzed by immunoblotting as indicated. **(e)** HCT 116 p53<sup>+/+</sup> cells were treated with or without DOX(2μg/ml), after 12 hours, lysates were immunoprecipitated using *ABROI*-specific antibody or IgG and analyzed by immunoblotting as indicated.

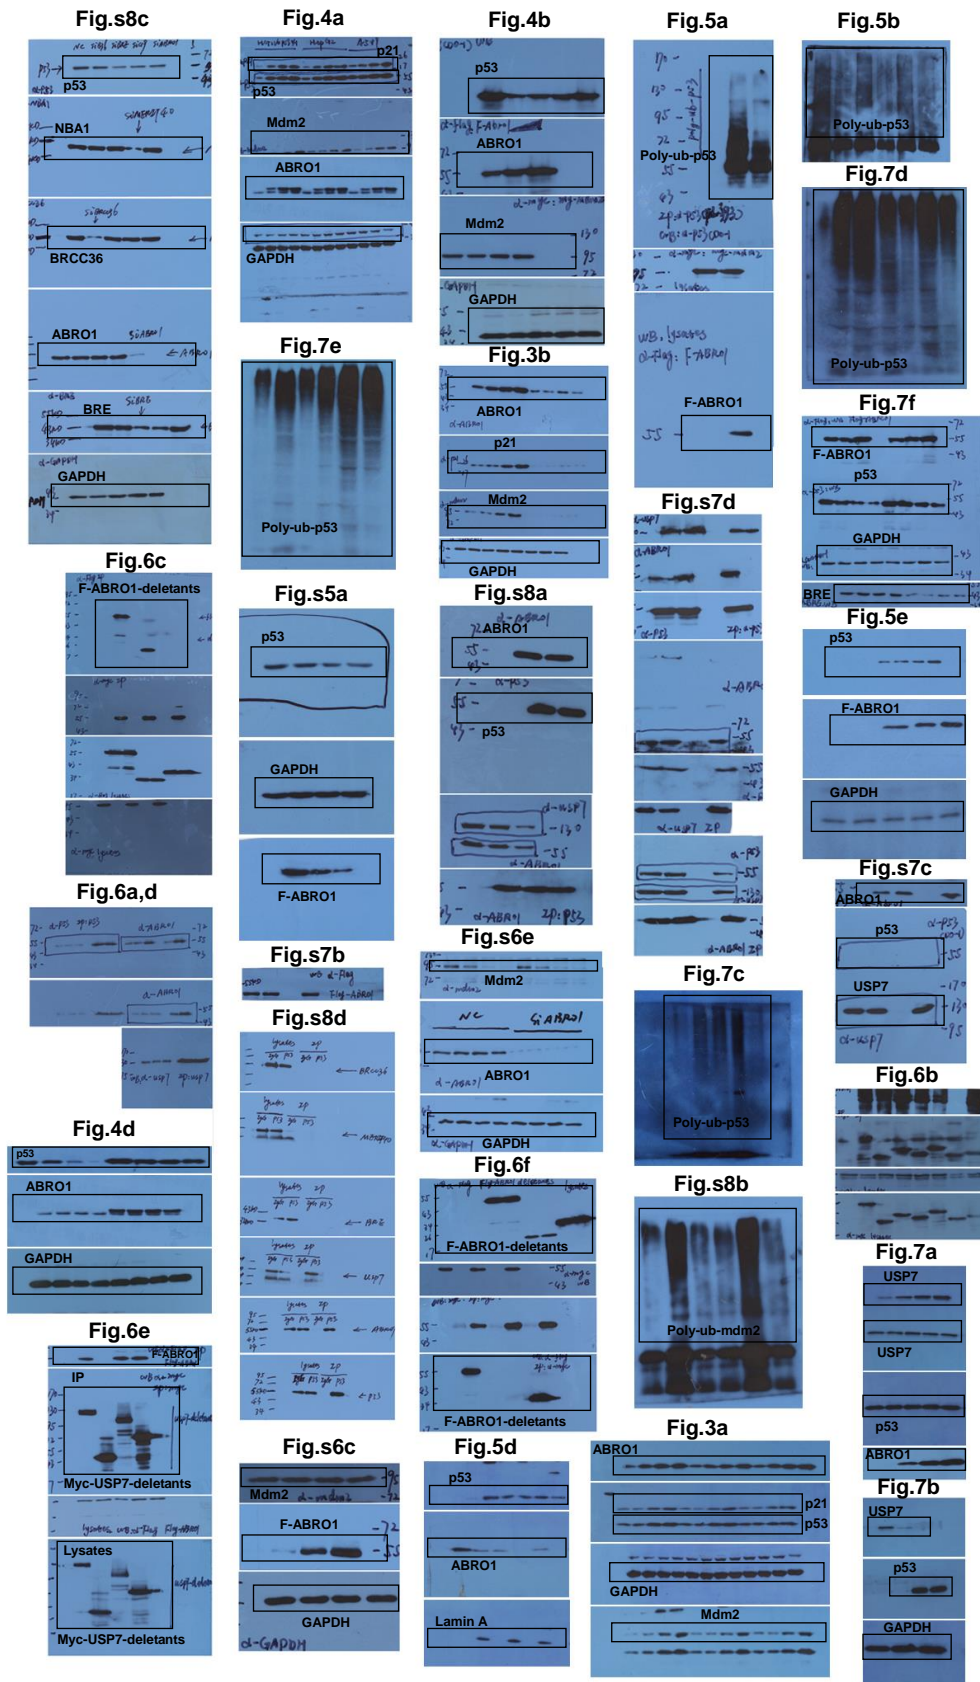

**Supplementary Figure 9.** Original scanned radiography films of western blots are provided for the corresponding panels.



**Supplementary Table 1.** Univariate and multivariate analysis of factors associated with survival of HCC patients.

| Clinical variables                 | Patients number | Hazard ratio (95% CI) | p value |
|------------------------------------|-----------------|-----------------------|---------|
| <b>Cohort 1</b>                    |                 |                       |         |
| Univariate analysis <sup>1</sup>   |                 |                       |         |
| ABRO1(low versus high)             | 44/46           | 0.5(0.3-1.1)          | <0.05   |
| Sex (male versus female)           | 77/13           | 0.8(0.3-1.9)          | 0.616   |
| Age (>50 versus ≤50 years)         | 65/25           | 1.0(0.5-2.0)          | 0.971   |
| HBV (positive versus negative)     | 88/2            | 0.05(0-550.5)         | 0.524   |
| Cirrhosis (yes versus no)          | 23/67           | 1.0(0.5-2.0)          | 0.886   |
| Tumour size (≥5 cm versus <5 cm)   | 39/51           | 0.5(0.2-0.9)          | 0.021   |
| TNM stage ( II /III versus I )     | 70/20           | 0.4(0.2-1.0)          | 0.051   |
| Multivariate analysis <sup>2</sup> |                 |                       |         |
| ABRO1(low versus high)             | 44/46           | 0.5(0.3-1.0)          | 0.044   |
| Cirrhosis (yes versus no)          | 23/67           | 1.1(0.5-2.2)          | 0.806   |
| Tumour size (≥5 cm versus <5 cm)   | 39/51           | 2.0(1.0-4.0)          | 0.068   |
| TNM stage ( II /III versus I )     | 70/20           | 1.8(0.6-5.0)          | 0.287   |
| <b>Cohort 2</b>                    |                 |                       |         |
| Univariate analysis <sup>1</sup>   |                 |                       |         |
| ABRO1(low versus high)             | 96/65           | 2.9(1.8-4.6)          | <0.001  |
| Sex (male versus female)           | 139/22          | 1.0(0.5-1.7)          | 0.782   |
| Age (>50 versus ≤50 years)         | 68/93           | 0.8(0.5-1.2)          | 0.229   |
| HBV (positive versus negative)     | 157/4           | 21(0.2-2763)          | 0.216   |
| Cirrhosis (yes versus no)          | 90/71           | 1.8(1.2-2.8)          | 0.008   |
| AFP (≥500 versus <500 ng/ml)       | 78/83           | 1.2(0.8-1.9)          | 0.318   |
| Tumour size (≥5 cm versus <5 cm)   | 101/60          | 2.8(1.7-4.5)          | <0.001  |
| TNM stage ( II /III versus I )     | 102/59          | 2.8(1.7-4.6)          | <0.001  |
| Multivariate analysis <sup>2</sup> |                 |                       |         |
| ABRO1(low versus high)             | 96/65           | 0.4(0.2-0.6)          | <0.001  |
| Cirrhosis (yes versus no)          | 90/71           | 1.8(1.1-2.8)          | 0.013   |
| Tumour size (≥5 cm versus <5 cm)   | 101/60          | 2.1(0.9-5.1)          | 0.094   |
| TNM stage ( II /III versus I )     | 102/59          | 1.2(0.5-2.9)          | 0.693   |

Analysis was conducted on HCC patients of Cohort 1, Cohort 2 as indicated. Hazard ratios (95% confidence interval) and p values were calculated using univariate or multivariate Cox proportional hazards regression in SPSS 19.0.

<sup>1</sup> The median value in each cohort was chosen for the cut-off point.

<sup>2</sup> Multivariate analysis was adjusted by sex and age.

Abbreviations: CI, confidence interval; HBV, hepatitis B virus; TNM, tumour-node-metastasis; AFP, alpha-fetoprotein.

**Supplementary Table 2.** Pearson Correlation analysis of each factors associated with survival of HCC patients.

|           |                     | Correlations |       |       |     |           |       |       |       |        |       |       |
|-----------|---------------------|--------------|-------|-------|-----|-----------|-------|-------|-------|--------|-------|-------|
|           |                     | Age          | sex   | HBV   | HCV | cirrhosis | stage | ABRO1 | time  | status | AFP   | size  |
| Age       | Pearson Correlation | 1            | .047  | -.025 | .a  | -.102     | -.139 | -.012 | .188  | -.008  | -.250 | -.190 |
|           | Sig. (2-tailed)     |              | .551  | .752  | .   | .200      | .079  | .884  | .017  | .919   | .001  | .016  |
|           | N                   | 161          | 161   | 161   | 161 | 161       | 161   | 161   | 161   | 161    | 161   | 161   |
| sex       | Pearson Correlation | .047         | 1     | -.064 | .a  | .047      | .014  | .106  | -.048 | -.007  | -.193 | .052  |
|           | Sig. (2-tailed)     | .551         |       | .424  | .   | .551      | .855  | .180  | .544  | .935   | .014  | .516  |
|           | N                   | 161          | 161   | 161   | 161 | 161       | 161   | 161   | 161   | 161    | 161   | 161   |
| HBV       | Pearson Correlation | -.025        | -.064 | 1     | .a  | -.061     | .117  | -.194 | -.188 | -.143  | -.005 | .117  |
|           | Sig. (2-tailed)     | .752         | .424  |       | .   | .439      | .138  | .014  | .017  | .071   | .950  | .138  |
|           | N                   | 161          | 161   | 161   | 161 | 161       | 161   | 161   | 161   | 161    | 161   | 161   |
| HCV       | Pearson Correlation | .a           | .a    | .a    | .a  | .a        | .a    | .a    | .a    | .a     | .a    | .a    |
|           | Sig. (2-tailed)     | .            | .     | .     | .   | .         | .     | .     | .     | .      | .     | .     |
|           | N                   | 161          | 161   | 161   | 161 | 161       | 161   | 161   | 161   | 161    | 161   | 161   |
| cirrhosis | Pearson Correlation | -.102        | .047  | -.061 | .a  | 1         | .134  | .042  | -.289 | -.091  | -.015 | .057  |
|           | Sig. (2-tailed)     | .200         | .551  | .439  | .   |           | .091  | .593  | .000  | .249   | .849  | .474  |
|           | N                   | 161          | 161   | 161   | 161 | 161       | 161   | 161   | 161   | 161    | 161   | 161   |
| stage     | Pearson Correlation | -.139        | .014  | .117  | .a  | .134      | 1     | -.196 | -.412 | -.225  | .192  | .844  |
|           | Sig. (2-tailed)     | .079         | .855  | .138  | .   | .091      |       | .013  | .000  | .004   | .015  | .000  |
|           | N                   | 161          | 161   | 161   | 161 | 161       | 161   | 161   | 161   | 161    | 161   | 161   |
| ABRO1     | Pearson Correlation | -.012        | .106  | -.194 | .a  | .042      | -.196 | 1     | .359  | .225   | -.012 | -.170 |
|           | Sig. (2-tailed)     | .884         | .180  | .014  | .   | .593      | .013  |       | .000  | .004   | .876  | .031  |
|           | N                   | 161          | 161   | 161   | 161 | 161       | 161   | 161   | 161   | 161    | 161   | 161   |
| time      | Pearson Correlation | .188         | -.048 | -.188 | .a  | -.289     | -.412 | .359  | 1     | .413   | -.133 | -.386 |
|           | Sig. (2-tailed)     | .017         | .544  | .017  | .   | .000      | .000  | .000  |       | .000   | .092  | .000  |
|           | N                   | 161          | 161   | 161   | 161 | 161       | 161   | 161   | 161   | 161    | 161   | 161   |
| status    | Pearson Correlation | -.008        | -.007 | -.143 | .a  | -.091     | -.225 | .225  | .413  | 1      | -.006 | -.225 |
|           | Sig. (2-tailed)     | .919         | .935  | .071  | .   | .249      | .004  | .004  | .000  |        | .940  | .004  |
|           | N                   | 161          | 161   | 161   | 161 | 161       | 161   | 161   | 161   | 161    | 161   | 161   |
| AFP       | Pearson Correlation | -.250        | -.193 | -.005 | .a  | -.015     | .192  | -.012 | -.133 | -.006  | 1     | .192  |
|           | Sig. (2-tailed)     | .001         | .014  | .950  | .   | .849      | .015  | .876  | .092  | .940   |       | .015  |
|           | N                   | 161          | 161   | 161   | 161 | 161       | 161   | 161   | 161   | 161    | 161   | 161   |
| size      | Pearson Correlation | -.190        | .052  | .117  | .a  | .057      | .844  | -.170 | -.386 | -.225  | .192  | 1     |
|           | Sig. (2-tailed)     | .016         | .516  | .138  | .   | .474      | .000  | .031  | .000  | .004   | .015  |       |
|           | N                   | 161          | 161   | 161   | 161 | 161       | 161   | 161   | 161   | 161    | 161   | 161   |
